# Supplementary material for: Structural Determinants for the Binding of Morphinan Agonists to the μ-Opioid Receptor
Source: PubMed Central journal article supplement (PMC4539194; doi:10.1371/journal.pone.0135998), 2015-08-17
Supplement: pone.0135998.s007.pdf [file pone.0135998.s007.pdf]

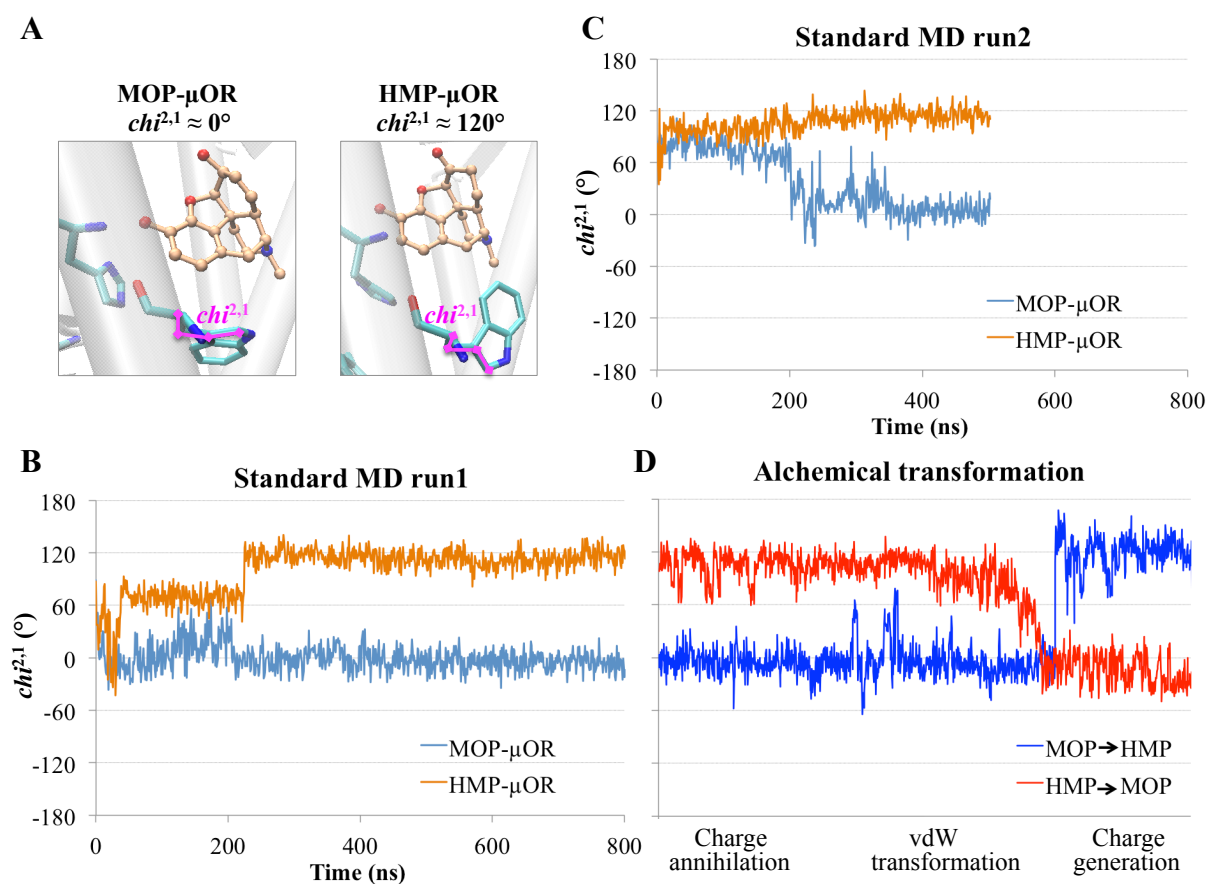

**Fig. S7-1. Simulations of MOP- $\mu$ OR and HMP- $\mu$ OR: the W293 side chain orientation.** (A) Basically, the W293 dihedral angle  $chi^{2,1}$  fluctuates around two favorable values ( $\sim 0^\circ$  in MOP- $\mu$ OR and  $\sim 120^\circ$  in HMP- $\mu$ OR). The  $chi^{2,1}$  value is plotted as a function of simulation time in (B, C) the two independent MD simulations for each system and in (D) the forward and backward alchemical free energy perturbations in the bound state.

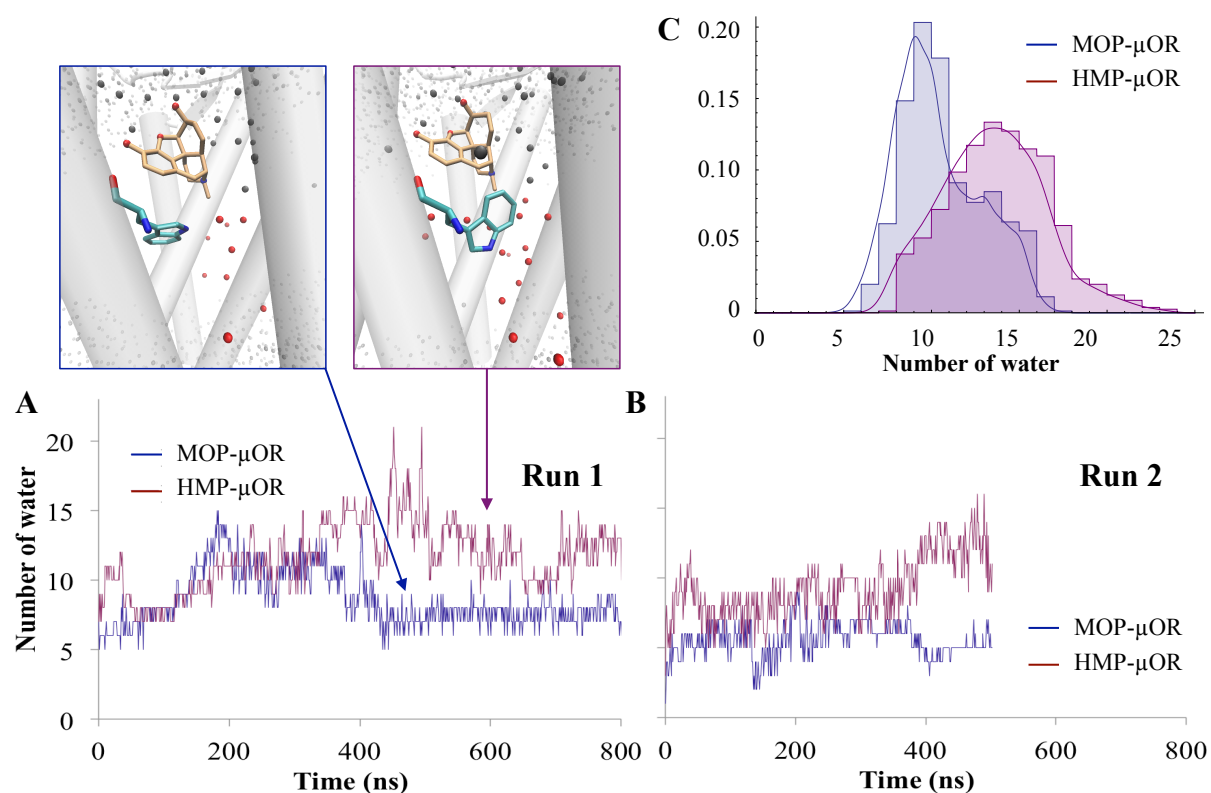

**Fig. S7-2. MD simulations of MOP- $\mu$ OR and HMP- $\mu$ OR: number of water molecules inside the  $\mu$ OR binding cavity. (A, B) The number plotted as a function of time in the two independent MD simulations. (C) Normalized histograms of the data plotted in (A).**

We performed Welch's  $t$ -test on the two sets of data plotted in Fig. S7-2A. The results (Table S7-1) indicate that the difference shown in Fig. S7-2A is statistically significant.

**Table S7-1. Welch's  $t$ -test<sup>a</sup> on the data shown in Fig. S7-2A.**

| P-value <sup>b</sup> | Difference in mean values | Standard error | 95% confidence interval of the difference | Intermediate values used in the test |      |
|----------------------|---------------------------|----------------|-------------------------------------------|--------------------------------------|------|
|                      |                           |                |                                           | $t$                                  | $df$ |
| < 0.0001             | 3.086                     | 0.133          | 2.825–3.347                               | 23.2261                              | 1541 |

<sup>a</sup>The test assumes normal distribution of the two datasets. Although this is not the case for MOP, the test has been shown to be still robust with a large sample size [1] (i.e.  $\geq 200$  [2]).

<sup>b</sup>P-value much less than the threshold (0.05) indicates significant difference between the two datasets.

**Table S7-2. Distances ( $\text{\AA}$ ) between the agonists and selected protein residues averaged over two independent MD runs.**

|     | MD run              | I296          | M151          | G325          | I322          |
|-----|---------------------|---------------|---------------|---------------|---------------|
| MOP | Run 1 (0.8 $\mu$ s) | 2.4 $\pm$ 0.2 | 2.2 $\pm$ 0.2 | 2.4 $\pm$ 0.3 | 3.3 $\pm$ 0.5 |
|     | Run 2 (0.5 $\mu$ s) | 2.4 $\pm$ 0.2 | 2.2 $\pm$ 0.2 | 2.9 $\pm$ 0.7 | 2.3 $\pm$ 0.2 |
| HMP | Run 1 (0.8 $\mu$ s) | 2.4 $\pm$ 0.2 | 2.3 $\pm$ 0.2 | 5.0 $\pm$ 0.3 | 2.7 $\pm$ 0.2 |
|     | Run 2 (0.5 $\mu$ s) | 2.6 $\pm$ 0.3 | 2.1 $\pm$ 0.2 | 5.8 $\pm$ 0.4 | 2.6 $\pm$ 0.3 |

## Supporting references

1. Fagerland MW. t-tests, non-parametric tests, and large studies--a paradox of statistical practice? *BMC medical research methodology*. 2012;12:78. Epub 2012/06/16. doi: 10.1186/1471-2288-12-78. PubMed PMID: 22697476; PubMed Central PMCID: PMC3445820.
2. Fagerland MW, Sandvik L. Performance of five two-sample location tests for skewed distributions with unequal variances. *Contemp Clin Trials*. 2009;30(5):490-6. doi: Doi 10.1016/J.Cct.2009.06.007. PubMed PMID: ISI:000270073800018.
